# Supplementary material for: Molecular Details of Olfactomedin Domains Provide Pathway to Structure-Function Studies
Source: PubMed Central journal article supplement (PMC4488277; doi:10.1371/journal.pone.0130888), 2015-06-29
Supplement: pone.0130888.s001.pdf [file pone.0130888.s001.pdf]

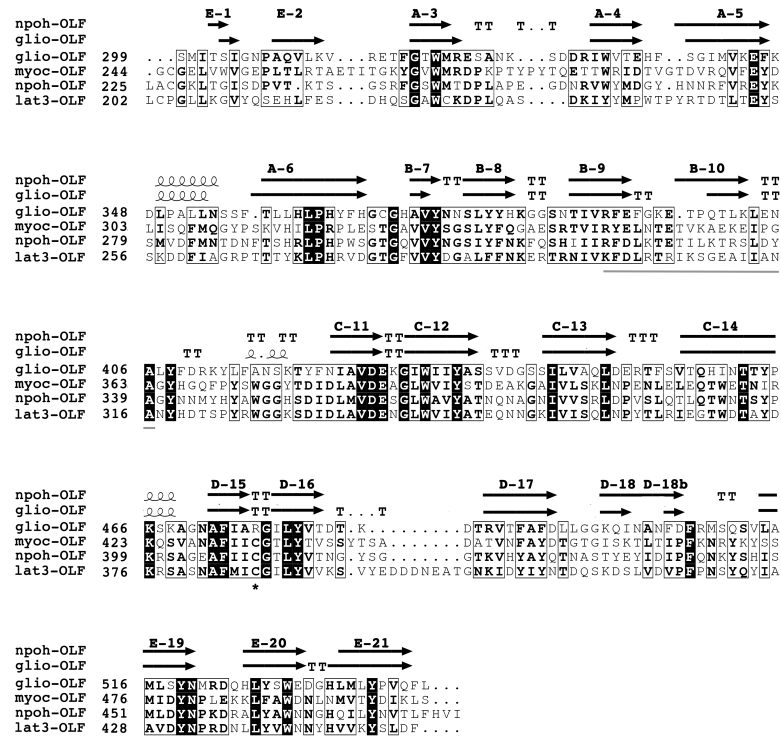

**S1 Fig. Multiple sequence alignment of npoh-OLF, glio-OLF, myoc-OLF, and lat3-OLF.**

Arrows:  $\beta$ -strands; T: turns; spiral feature,  $\alpha$ -helices. White residues with black background: identical residues; boxed residues colored black, similar; asterisk, cysteine residue present in npoh-OLF, myoc-OLF, and lat3-OLF but absent in glio-OLF; underline: myocilin peptide stretch for custom antibody.
