# Supplementary material for: Molecular Details of Olfactomedin Domains Provide Pathway to Structure-Function Studies
Source: PubMed Central journal article supplement (PMC4488277; doi:10.1371/journal.pone.0130888), 2015-06-29
Supplement: pone.0130888.s002.pdf [file pone.0130888.s002.pdf]

**S1 Table: Primers used in this study.**

| <b><u>Npoh-OLF Cloning</u></b> |               |         |                                      |
|--------------------------------|---------------|---------|--------------------------------------|
| Plasmid Template               | Target Vector |         | Primer Used                          |
| pcDNA (Open Biosystems)        | pET-30 Xa/LIC | Forward | 5'-GGTATTGAGGGTCGCCTCCGTGCATGC       |
|                                |               | Reverse | 5'-AGAGGAGAGTTAGAGCCTCATCACAACCTCGTC |
| pET-30 Xa/LIC                  | pMAL-c4x      | Forward | 5'-CGCCGAGCTCTATTGAGGGTCGC           |
|                                |               | Reverse | 5'-GCCGAATTCAGGAGAGTTAGAGCCTTATCA    |
| Npoh-OLF (C221G)               | Mutagenesis   | Forward | 5' GGTTCGCCTCCGTGCAGGCATGCAAAAAGTAGC |
| <b><u>Glio-OLF Cloning</u></b> |               |         |                                      |
| Plasmid Template               | Target Vector |         | Primer Used                          |
| pcDNA (Open Biosystems)        | pET-30 Xa/LIC | Forward | 5'-GGTATTGAGGGTCGCGATACCTTGGTG       |
|                                |               | Reverse | 5'-AGAGGAGAGTTAGAGCCTCATCACCGCTG     |
| pET-30 Xa/LIC                  | pMAL-c4x      | Forward | 5'-CGCCGAGCTCTATTGAGGGTCGC           |
|                                |               | Reverse | 5'-GCCGAATTCAGGAGAGTTAGAGCCTTATCA    |
